# Supplementary material
Source: Springer Nature journal article supplement (https://www.springermedizin.de/resource/supplementary/12874_2002_34_MOESM3_ESM.pdf/9433682)

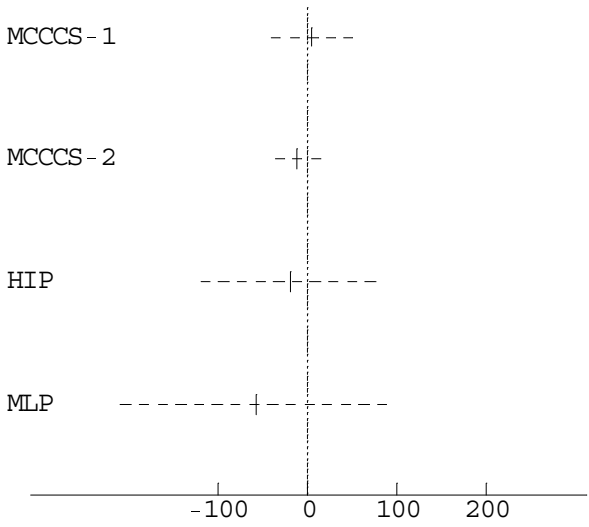

Supplement: MOESM3 [file 9433682]
